1

## 2       **The *Pseudomonas aeruginosa* phosphodiesterase gene *nbdA* is** 3       **transcriptionally regulated by RpoS and AmrZ**

4               Katrin Gerbracht<sup>1</sup>, Susanne Zehner and Nicole Frankenberg-Dinkel\*

5

6 **Author affiliations:** Technische Universität Kaiserslautern, Fachbereich Biologie, Abteilung  
7 Mikrobiologie, Paul-Ehrlich-Straße 23, D-67663 Kaiserslautern, Germany

8 **\*Correspondence:** Nicole Frankenberg-Dinkel, [nfranken@bio.uni-kl.de](mailto:nfranken@bio.uni-kl.de)

9 **Keywords:** *Pseudomonas aeruginosa*, phosphodiesterase, c-di-GMP, nitric oxide, transcription

10 **Abbreviations:** c-di-GMP, bis-3,5-cyclic di-guanosine monophosphate; DGC, diguanylate cyclase;  
11 NO, nitric oxide; PDE, phosphodiesterase; RACE, rapid amplification of cDNA ends;

### 12 **ABSTRACT**

13 *Pseudomonas aeruginosa* is an opportunistic pathogen causing serious infections in immune  
14 compromised persons. These infections are difficult to erase with antibiotics, due to the  
15 formation of biofilms. The biofilm lifecycle is regulated by the second messenger molecule c-  
16 di-GMP (bis-3,5-cyclic di-guanosine monophosphate). *P. aeruginosa* encodes 40 genes for  
17 enzymes presumably involved in the biosynthesis and degradation of c-di-GMP. A tight  
18 regulation of expression, subcellular localized function and protein interactions control the  
19 activity of these enzymes. In this work we elucidated the transcriptional regulation of the  
20 gene encoding the membrane-bound phosphodiesterase NbdA. We previously reported a  
21 transcriptional and posttranslational role of nitric oxide (NO) on *nbdA* and its involvement in  
22 biofilm dispersal. NO is released from macrophages during infections but can also be  
23 produced by *P. aeruginosa* itself during anaerobic denitrification. Recently however,  
24 contradictory results about the role of NbdA within NO-induced biofilm dispersal were  
25 published. Therefore, the transcriptional regulation of *nbdA* was reevaluated to obtain  
26 insights into this discrepancy. Determination of the transcriptional start site of *nbdA* by  
27 5'-RACE and subsequent identification of the promoter region revealed a shortened open  
28 reading frame (ORF) in contrast to the annotated one. In addition, putative binding sites for  
29 RpoS and AmrZ were discovered in the newly defined promoter region. Employing  
30 chromosomally integrated transcriptional *lacZ* reporter gene fusions demonstrated a RpoS-  
31 dependent activation and AmrZ repression of *nbdA* transcription. In order to investigate the  
32 impact of NO on *nbdA* transcription, conditions mimicking exogenous and endogenous NO  
33 were applied. While neither exogenous nor endogenous NO had an influence on *nbdA*  
34 promoter activity, deletion of the nitrite reductase gene *nirS* strongly increased *nbdA*  
35 transcription independently of its enzymatic activity during denitrification. The latter supports  
36 a role of NirS in *P. aeruginosa* apart from its enzymatic function.

### 37 **IMPORTANCE**

38 The opportunistic pathogen *Pseudomonas aeruginosa* possesses a network of genes  
39 encoding proteins for the turnover of the second messenger c-di-GMP involved in regulating-  
40 among others-the lifestyle switch between planktonic, motile cells and sessile biofilms.  
41 Insight into the transcriptional regulation of these genes is important for the understanding of  
42 the protein function within the cell. Determination of the transcriptional start site of the  
43 phosphodiesterase gene *nbdA* revealed a new promoter region and consequently a

---

<sup>1</sup> ORCID: KG: 0000-0001-8930-3398; SZ: 0000-0003-3758-484X; NFD: 0000-0002-7757-6839

44 shortened open reading frame for the corresponding protein. Binding sites for RpoS and  
45 AmrZ were identified *in silico* and confirmed experimentally. Previously reported regulation  
46 by nitric oxide was reevaluated and a strong influence of the moonlighting protein NirS  
47 identified.

48

## 49 INTRODUCTION

50 The opportunistic human pathogen *Pseudomonas aeruginosa* is able to form acute and  
51 chronic infections, the latter associated with biofilm formation (1). Within biofilms, bacteria  
52 are embedded in a self-produced matrix and are highly protected against the host immune  
53 system and antibiotic treatments (2, 3). Therefore, biofilm associated infections are difficult to  
54 treat and the *P. aeruginosa* biofilm lifecycle has become a well-studied topic in the last  
55 decades. Environmental cues like changes in nutrient availability or the diatomic gas nitric  
56 oxide (NO) are able to induce biofilm dispersal by promoting a switch between the sessile  
57 and planktonic lifestyle of the bacteria (4-6). In general, the biofilm lifecycle is dependent on  
58 the second messenger bis-(3,5)-cyclic diguanosine-monophosphate (c-di-GMP). However, c-  
59 di-GMP does not only regulate the biofilm lifecycle, but rather is involved in various bacterial  
60 processes e.g., motility, secretion systems, virulence and cell cycle progression (7). The  
61 intracellular level of c-di-GMP is dependent on diguanylate cyclases (DGC) that build c-di-  
62 GMP from two molecules of GMP and c-di-GMP-specific phosphodiesterases (PDE) that  
63 hydrolyze c-di-GMP to either pGpG or GMP (8-12). DGC domains contain a conserved  
64 GGDEF motif whereas PDE domains contain either an EAL or HD-GYP motif. Typically,  
65 bacteria encode multiple DGC, PDE or tandem enzymes. Adjustment of the intracellular c-di-  
66 GMP concentration can be achieved by regulating the production of c-di-GMP modulating  
67 proteins on different levels: transcription, post-transcription and post-translation.

68 On the transcriptional level, control of gene expression by various transcription factors or  
69 alternative sigma factors that react to changing environmental or growth conditions allows a  
70 temporal separation of redundant PDEs or DGCs within a bacterial cell. For instance, in *E.*  
71 *coli* many DGC or PDE encoding genes are under the control of the alternative sigma factor  
72 RpoS ( $\sigma^S$ ) which regulates genes for stationary growth phase or stress responses (13). Post-  
73 transcriptionally, RNA-binding proteins like CsrA of *E. coli* or RsmA of *P. aeruginosa* are able  
74 to influence the translation of DGCs or PDEs by binding to corresponding mRNAs (14, 15).  
75 Functional sequestration of DGCs and PDEs within a cell is achieved on the post-  
76 translational level. For example, PDEs with EAL-motif often require dimerization to enable c-  
77 di-GMP hydrolysis (16). Binding of GTP to the GGDEF domain of the *P. aeruginosa* RbdA  
78 enhances PDE activity of the tandem protein (17). Diguanylate cyclases can be object of  
79 product feedback inhibition by binding of c-di-GMP to the I-site of the DGC domain (18).  
80 Additionally, PDE and DGC domains are often coupled to sensory domains, which allows  
81 stimulation of activity in response to environmental signals. Binding of O<sub>2</sub> to the heme co-  
82 factor of the *E. coli* DosP for example is required for the proteins PDE activity (19). In the  
83 case of PA0575 of *P. aeruginosa*, binding of L-arginine to a sensory Venus flytrap (VFT)  
84 domain stimulates c-di-GMP degradation (20). Another possibility to avoid functional  
85 redundancies of c-di-GMP modulating proteins is introduced by the “fountain model”. It  
86 proposes spatial sequestration of particular DGCs and PDEs within a cell and the influence  
87 on only a local c-di-GMP pool rather than on the global c-di-GMP concentration (21).

88 In *P. aeruginosa*, the c-di-GMP modulating network consists of 40 DGC, PDE or tandem  
89 proteins which contain both domains (22). One of them is the NO-induced biofilm dispersion  
90 locus A (NbdA). NbdA is a three domain protein, consisting of the membrane anchored  
91 MHYT domain, a diguanylate cyclase domain with a degenerated GGDEF motif and a  
92 phosphodiesterase domain with an EAL motif (23). NbdA was shown to be a functional  
93 phosphodiesterase, lacking DGC activity (23). The MHYT domain of NbdA is predicted to be  
94 a sensory domain for diatomic gases like oxygen, NO or carbon monoxide (CO) (24). In a  
95 previous study we observed that a *nbdA* deletion mutant showed glutamate-induced biofilm  
96 dispersal, but was unable to disperse in response to nitric oxide. Additionally, we suggested  
97 transcriptional regulation of *nbdA* by NO as *nbdA* transcript levels were increased in NO-  
98 treated planktonic cells or dispersed cells after NO-induced dispersal when compared to

99 untreated planktonic cells (23). In *P. aeruginosa* NbdA is not the only protein involved in NO-  
 100 induced biofilm dispersal as deletion mutants of the PDEs *rbdA* and *dipA* both display the  
 101 same phenotype as  $\Delta nbdA$  (25). However, in a biofilm model on airway epithelial cells it was  
 102 demonstrated that the deletion of neither *nbdA*, *rbdA* nor *dipA* led to a loss of biofilm  
 103 dispersal in response to NO (26). These contrary findings underline, that c-di-GMP  
 104 modulating proteins are tightly regulated in *P. aeruginosa* and changes in environmental  
 105 conditions might impact expression or activity of those enzymes. Therefore, we decided to  
 106 reevaluate the transcriptional regulation of *nbdA* to obtain insights into this discrepancy and  
 107 to gain a better understanding of NbdA's role within the c-di-GMP network of *P. aeruginosa*  
 108 PAO1.

109

## 110 MATERIAL AND METHODS

### 111 Bacterial strains and growth conditions

112 All strains used in this study are listed in Table 1. If not stated otherwise, bacteria were  
 113 grown in LB medium at 37 °C. For denitrification conditions, growth medium was  
 114 supplemented with 50 mM KNO<sub>3</sub>. Pseudomonas isolation agar was used for selection of  
 115 *P. aeruginosa* after mating procedures. Antibiotics were used in following concentrations:  
 116 gentamicin, 10 µg ml<sup>-1</sup> (*E. coli*); 75 µg ml<sup>-1</sup> (*P. aeruginosa*); tetracycline, 5 µg ml<sup>-1</sup> (*E. coli*);  
 117 100 µg ml<sup>-1</sup> (*P. aeruginosa*).

118 **Table 1: Strains and plasmids used in this study.**

| Strain                      | Genotype                                                                                                 | Reference |
|-----------------------------|----------------------------------------------------------------------------------------------------------|-----------|
| <i>E. coli</i>              |                                                                                                          |           |
| DH5α                        | F' φ80dlacZΔM15 Δ( <i>lacZYA-argF</i> )U169 <i>endA1 hsdR17 deoR</i><br><i>gyrA96 thi-1 relA1 supE44</i> | (27)      |
| S17-1                       | <i>recA pro thi hsdR<sup>M</sup> Tp<sup>r</sup> Sm<sup>r</sup></i> ; RP4:2 Tc::Mu-Km::Tn7/λpir           | (28)      |
| <i>P. aeruginosa</i>        |                                                                                                          |           |
| PAO1                        | wild type (wt) DSM 22644                                                                                 | DSMZ      |
| wt mini-CTX1- <i>lacZ</i>   | PAO1 with mini-CTX1- <i>lacZ</i> integrated at <i>attB</i> site                                          | This work |
| wt <i>pnbA-lacZ</i>         | PAO1 with mini-CTX1- <i>pnbA-lacZ</i> integrated at <i>attB</i> site                                     | This work |
| Δ <i>rpoS</i>               | <i>rpoS</i> deletion mutant in PAO1 background                                                           | This work |
| Δ <i>rpoS pnbA-lacZ</i>     | Δ <i>rpoS</i> with mini-CTX1- <i>pnbA-lacZ</i> integrated at <i>attB</i> site                            | This work |
| Δ <i>amrZ</i>               | <i>amrZ</i> deletion mutant in PAO1 background                                                           | This work |
| Δ <i>amrZ pnbA-lacZ</i>     | Δ <i>amrZ</i> with mini-CTX1- <i>pnbA-lacZ</i> integrated at <i>attB</i> site                            | This work |
| Δ <i>nirS</i>               | <i>nirS</i> deletion mutant in PAO1 background                                                           | This work |
| Δ <i>nirS pnbA-lacZ</i>     | Δ <i>nirS</i> with mini-CTX1- <i>pnbA-lacZ</i> integrated at <i>attB</i> site                            | This work |
| Δ <i>nirF</i>               | <i>nirF</i> deletion mutant in PAO1 background                                                           | This work |
| Δ <i>nirF pnbA-lacZ</i>     | Δ <i>nirF</i> with mini-CTX1- <i>pnbA-lacZ</i> integrated at <i>attB</i> site                            | This work |
| Δ <i>norCB</i>              | <i>norCB</i> deletion mutant in PAO1 background                                                          | This work |
| Δ <i>norCB pnbA-lacZ</i>    | Δ <i>norCB</i> with mini-CTX1- <i>pnbA-lacZ</i> integrated at <i>attB</i> site                           | This work |
| Plasmid                     | Relevant properties                                                                                      |           |
| pEXG2                       | Gm <sup>r</sup> , <i>mob</i> , <i>sacB</i>                                                               | (29)      |
| pEXG2-Δ <i>rpoS</i>         | truncated <i>rpoS</i> with 452 bp up and 439 bp downstream                                               | This work |
| pEXG2-Δ <i>amrZ</i>         | truncated <i>amrZ</i> with 484 bp up and 485 bp downstream                                               | This work |
| pEXG2-Δ <i>nirS</i>         | truncated <i>nirS</i> with 448 bp up and 512 bp downstream                                               | This work |
| pEXG2-Δ <i>nirF</i>         | truncated <i>nirF</i> with 517 bp up and 491 bp downstream                                               | This work |
| pEXG2-Δ <i>norCB</i>        | truncated <i>norCB</i> with 452 bp up and 439 bp downstream                                              | This work |
| mini-CTX1- <i>lacZ</i>      | Tet <sup>r</sup> , <i>lacZ</i> , FRT site, <i>attP</i> site, <i>int</i>                                  | (30)      |
| mini-CTX1- <i>pnbA-lacZ</i> | transcriptional fusion of <i>nbdA</i> promoter to <i>lacZ</i>                                            | This work |
| pDrive                      | PCR cloning vector                                                                                       | Qiagen    |

119

### 120 Plasmid and strain construction

121 Oligonucleotides used for plasmid construction are listed in Table 2. Markerless deletion  
 122 mutants were produced as described previously with minor modifications (31). DNA  
 123 fragments were generated for each deletion via splicing-by-overlap extension (SOE) PCR  
 124 using the corresponding Up and Down primer pairs (Table 2) and integrated into the allelic  
 125 exchange vector pEXG2 (29). The vector was transferred from *E. coli* S17-I to *P. aeruginosa*  
 126 PAO1 via biparental mating. Pseudomonas isolation agar supplemented with gentamicin was  
 127 used to select cells which integrated the allelic exchange vector by homologous  
 128 recombination. Those cells were streaked twice on LB medium containing sucrose (15 %  
 129 w/v) to force the second crossover event. Truncation of target genes was verified via colony  
 130 PCR and sequencing.

131 Transcriptional *nbdA-lacZ* fusion was generated in the vector mini-CTX1-*lacZ* (30). A 171 bp  
 132 fragment of the *nbdA* promoter region and 279 bp of the coding sequence was amplified via  
 133 PCR and integrated in front of the promoterless *lacZ* gene encoded on the vector. The  
 134 transcriptional fusion and the empty vector control were transferred to *P. aeruginosa* strains  
 135 via biparental mating and chromosomally integrated into the *attB* site on the genome via  
 136 integrase-mediated chromosomal integration.

137 **Table 2: Primers used in this study.**

| Primer                              | Sequence (5'→3')                             |
|-------------------------------------|----------------------------------------------|
| <b>deletion mutant construction</b> |                                              |
| <i>rpoS</i> -Up-F                   | GCGCCTGCAGCAAGCTCCAGCATCTGGAGCGCTG           |
| <i>rpoS</i> -Up-R                   | CTCCTGGAGCCCGGCATCGCGCTGAAGCGCCTGCGG         |
| <i>rpoS</i> -Down-F                 | GATGCCGGGCTCCAGGAGGAG                        |
| <i>rpoS</i> -Down-R                 | GCGCCTCGAGTCGGCCGTTTTGCCTCAAACGGAA           |
| <i>rpoS</i> -seqF                   | CTAGAATCGCGCGCGCTTAGCCG                      |
| <i>rpoS</i> -seqR                   | TGCTCGGGGCGCGTCTGTTT                         |
| <i>amrZ</i> -Up-F                   | GCGCAAGCTTGATGCACCGATCAACGC                  |
| <i>amrZ</i> -Up-R                   | CTCCGCATCGTGTGCGGTAGGAGTTGCCTGTTTCA          |
| <i>amrZ</i> -Down-F                 | GCACACGATGCGGAG                              |
| <i>amrZ</i> -Down-R                 | GCGCGAATTCTCAGTTGACCAGCAGAAC                 |
| <i>amrZ</i> -seqF                   | ACCCAGCACGTCGAT                              |
| <i>amrZ</i> -seqR                   | GGAATGACTCCGGGCT                             |
| <i>nirS</i> -Up-F                   | GCGCCTGCAGAAGAGGACAGGGCGAACGTCAGCGC          |
| <i>nirS</i> -Up-R                   | GGCACCTTGCTCGCCTCGCGGCTGATCACCCGACCGGTAAG    |
| <i>nirS</i> -Down-F                 | CGAGGCGAGCAAGGTGCCAC                         |
| <i>nirS</i> -Down-R                 | GCGCCTCGAGCCAGGTAGCAGATACCGCCTTCGCG          |
| <i>nirS</i> -seqF                   | TGAGGAGAAGCGGCGCGAGGGGA                      |
| <i>nirS</i> -seqR                   | GATGTCGAAGCGCAACGCGACGAAACG                  |
| <i>nirF</i> -Up-F                   | GCGCCTGCAGCAGGTAGCGCAGGTGTTGCCG              |
| <i>nirF</i> -Up-R                   | AGCCAGCAGCCGCCCTTGCCGAGCGGCATCTTCTTCAGCCAC   |
| <i>nirF</i> -Down-F                 | CAAGGGCGGCTGCTGGCTACA                        |
| <i>nirF</i> -Down-R                 | GCGCCTCGAGCGCCGAAGCGGAACTCGCG                |
| <i>nirF</i> -seqF                   | ATGGCCACATCGGCAGGCGAC                        |
| <i>nirF</i> -seqR                   | GCTCCCCCTACGAGGAACCGTG                       |
| <i>norCB</i> -Up-F                  | GCGCAAGCTTTGCTGGCGCCGGTGTATACGC              |
| <i>norCB</i> -Up-R                  | TAGGCGACCAGGCCGATGAGCCCGCCGAAATAGATGTTCTGCGC |
| <i>norCB</i> -Down-F                | CTCATCGGCCTGGTCGCTACC                        |
| <i>norCB</i> -Down-R                | GGGGAATTCATTTCCAGTTCGGCGTCTGCCG              |
| <i>norCB</i> -seqF                  | TCATCGGCGACGGCATGGACC                        |
| <i>norCB</i> -seqR                  | ATCGGTTGCAGCAGCAGCTGG                        |
| pEXG2-seqF                          | CGACCTCATTCTATTAGACTCTCGTTTGGATTGC           |
| pEXG2-seqR                          | GTTGCTCGCGTATCGGTGATTCATTCTG                 |
| <b><i>pnbA-lacZ</i> fusion</b>      |                                              |
| <i>pnbA-lacZ</i> -F                 | GCGCGAATTCATGCCTTTTCTCCCCGGGAAAATGC          |
| <i>pnbA-lacZ</i> -R                 | GCGCGGATCCCAGGTCGTAGCGCAGGGCGA               |
| <i>lacZ</i> -rev                    | GGATTTCTTACCGGAAATACGGG                      |
| seq3miniCTX <i>lacZ</i>             | ATCCACCGGCGCGGTAATACG                        |
| <b>RT-PCR</b>                       |                                              |
| <i>nbdA</i> -RT1-F                  | TTCTCGACCTCGATCACTT                          |
| <i>nbdA</i> -RT1-R                  | TGGGTTCTTTCATCTTCTGC                         |
| <i>recA</i> -RT1-F                  | GACCGAGGCGTAGAACTTCA                         |
| <i>recA</i> -RT1-R                  | CAACTGCCGTGTCATCTTCA                         |
| <b>5'-RACE primer</b>               |                                              |
| SP1_ <i>nbdA</i> :                  | ATGGCTGGTAGTACTGGGTGGC                       |

|                          |                                            |
|--------------------------|--------------------------------------------|
| SP3_BgIII_nbdA           | TAAGATCTGGCGAATAGGTGCAGTTCTG               |
| Oligo (dT) anchor primer | GACCAGATCTATCGATGTCGACTTTTTTTTTTTTTTTTTTV* |
| anchor-1 primer          | GACCAGATCTATCGATGTCGACT                    |

---

138 \* V= A,C or G

### 139 **β-Galactosidase assay**

140 For measurements of promoter activity the β-galactosidase assay protocol of Miller (32) was  
141 modified as follows. Overnight cultures containing the promoter-*lacZ* fusion were diluted to  
142 an OD<sub>600</sub> of 0.01 in 20 ml LB with respective antibiotics. In exponential (4 h) and early  
143 stationary growth phase (7 h) OD<sub>600</sub> was measured and cells of 100 μl culture were harvested  
144 by centrifugation. Cells were resuspended in 800 μl Z-buffer (60 mM Na<sub>2</sub>HPO<sub>4</sub> x 7H<sub>2</sub>O;  
145 40 mM NaH<sub>2</sub>PO<sub>4</sub> x H<sub>2</sub>O; 10 mM KCl; 1 mM MgSO<sub>4</sub> x 7H<sub>2</sub>O; 50 mM β-mercaptoethanol). To  
146 permeabilize the cells 25 μl of 0.1 % (w/v) sodium-dodecyl sulfate (SDS) and 25 μl  
147 chloroform were added. After 5 min incubation 200 μl of 4 mg/ml *ortho*-nitrophenyl-β-D-  
148 galactosid (ONPG) were added to the mixture at 37 °C to start the reaction. When  
149 β-galactosidase activity was indicated by a color change due to the formation of the yellow  
150 colored product *ortho*-nitrophenol, the reaction was stopped by addition of 500 μl 1 M  
151 Na<sub>2</sub>CO<sub>3</sub>. Cell debris was precipitated by centrifugation and product formation was measured  
152 in the supernatant at OD<sub>420</sub>. The activity of β-galactosidase was calculated as follows: Miller  
153 units (MU) = (OD<sub>420</sub> / (OD<sub>600</sub> \* volume \* incubation time)) \* 1000.

### 154 **RNA extraction and semi quantitative RT-PCR**

155 Bacteria were grown to exponential and early stationary phase as described above. To  
156 prevent RNA degradation, cells of an equivalent of OD<sub>600</sub> = 1 in 1 ml were mixed with 100 μl  
157 RNA stop solution (5 % (v/v) phenol in ethanol). Cell pellets were stored at -80 °C or used  
158 directly for RNA extraction. RNA was extracted by enzymatic lysis according to Qiagen RNA  
159 protect handbook and further purified with the RNeasy Plus Mini kit (Qiagen) following the  
160 suppliers instruction. Extracted RNA was transcribed into cDNA using ProtoScript II Reverse  
161 Transcriptase (New England Biolabs) according to the manufacturers' protocol. 2.5 ng of  
162 cDNA were used as template for 25 μl semi quantitative RT-PCR reaction. Used primers are  
163 listed in Table 2.

### 164 **Determination of transcriptional start sites by 5'-RACE**

165 *P. aeruginosa* cells were inoculated 1:100 from an overnight culture in LB medium and  
166 incubated 5 h at 37 °C. Total RNA isolation was performed as previously described (33).  
167 Primers used for 5'-RACE are listed in Table 2. cDNA was synthesized at 42 °C for 60 min  
168 with M-MLV-RT (Promega) using gene-specific primer SP1\_nbdA. The cDNA was treated  
169 with shrimp alkaline phosphatase (New England Biolabs) and purified with MinElute kit  
170 (Qiagen). A deoxyadenosine tail was added to the 3' end of the cDNA using terminal  
171 transferase (Thermo Fisher Scientific). Second-strand synthesis was performed with an oligo  
172 (dT) anchor primer. The obtained double-stranded DNA was amplified with the anchor-1  
173 primer and nested gene-specific primer SP3\_BgIII\_nbdA. The resulting PCR product was  
174 purified (MinElute kit, Qiagen) and cloned in pDrive using the Qiagen PCR cloning kit  
175 (Qiagen). For the determination of the transcriptional start site 10 individual clones were  
176 sequenced.

177

178 **RESULTS**

179 **Determination of transcriptional start site of *ncdA* reveals a regulatory region with**  
180 **RpoS and AmrZ binding sites**

181 Automated annotation of the genome sequence of PAO1 predicted the open reading frame  
182 (ORF) for *ncdA* to code for 783 amino acid residues. Sequence alignments of the translated  
183 sequence with proteins containing N-terminal MHYT-domains revealed a long N-terminal  
184 extended region for NcdA. This incited us to analyze the gene region in more detail. In close  
185 proximity to the annotated start codon no ribosomal binding site (RBS) could be detected. A  
186 5'-RACE PCR experiment revealed the transcriptional start site of *ncdA* 103 nucleotides  
187 downstream of the computationally annotated translation start (Fig. 1). The nearest potential  
188 translational start site is 170 nucleotides downstream of the previously annotated translation  
189 start and possesses a bona fide ribosome binding site. This results in a shorter ORF coding  
190 for a 726 amino acid protein whose N-terminus aligns well with the N-termini of other MHYT-  
191 domain proteins. With the new defined transcriptional start, the *ncdA* promoter region was  
192 analyzed. Conserved binding sites for the alternative sigma factor RpoS ( $\sigma^S$ ) and the  
193 transcription factor AmrZ were identified (34, 35).

194

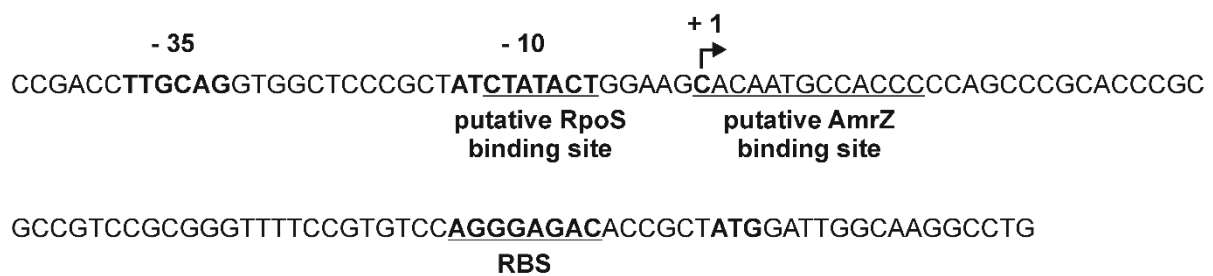

195

196 **Fig. 1:** Reannotation of the promoter region of *ncdA* with the experimentally determined transcriptional start site. 5'-RACE PCR  
197 experiments revealed transcriptional start site of the *ncdA* gene with a C (+1), 171 nucleotides downstream from the previously  
198 annotated ORF start site (*Pseudomonas* database (36)). The promoter region of *ncdA* was reanalyzed and reveals deduced  
199 binding sequences for the alternative  $\sigma$ -factor RpoS and the transcriptional regulator AmrZ.

200

201 The binding motif for RpoS lies in the -10 region of the *ncdA* promoter. The predicted AmrZ  
202 binding sequence covers the transcriptional start site of *ncdA* indicating a repressor function.  
203 In order to investigate the role of the alternative sigma factor RpoS and the transcription  
204 factor AmrZ on *ncdA* expression, the promoter region of *ncdA* was transcriptionally fused to  
205 the reporter gene *lacZ* and integrated in the  $\phi$ CTX attachment site of PAO1 wt,  $\Delta$ *rpoS* and  
206  $\Delta$ *amrZ*. Activity of the  $\beta$ -galactosidase in the respective strains was determined in  
207 exponential (4 h) and early stationary (7 h) growth phase. In the wt strain, a 4-fold increase in  
208 *ncdA* transcription was observed when cells entered the early stationary phase, which  
209 suggests transcriptional activation by RpoS. Deletion of *rpoS* resulted in a loss of *ncdA*  
210 promoter activity in both, exponential and stationary growth phase (Fig. 2), confirming the  
211 role of RpoS as transcriptional activator of *ncdA*. In the  $\Delta$ *amrZ* strain a strong increase of  
212 *ncdA* promoter activity was observed in both, exponential and early stationary growth phase  
213 (Fig. 2). AmrZ is therefore likely acting as a transcriptional repressor for *ncdA*.

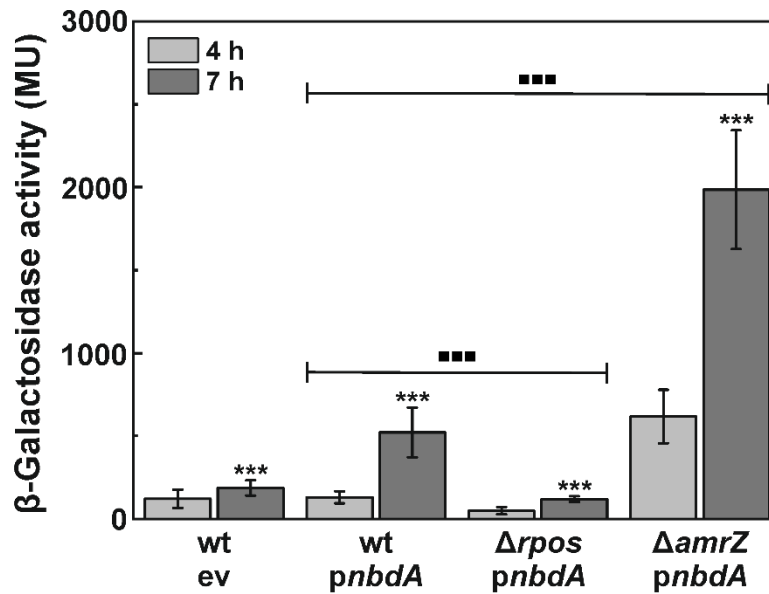

214

215 **Fig. 2:** Transcription of *nbdA* is activated by RpoS and repressed by AmrZ. Promoter activity was determined with integrated  
216 *pnbDA-lacZ* fusions in late exponential (4 h) and early stationary (7 h) growth phase in wild type (wt) and deletion mutants  $\Delta rpoS$   
217 and  $\Delta amrZ$ . Additionally, the wt with integrated empty vector (ev) was tested for background  $\beta$ -galactosidase activity. The assay  
218 was performed in triplicates. Significant changes between 4 and 7 h samples are marked with \*. Significant changes in *nbdA*  
219 expression levels between deletion mutant strains and the corresponding wt sample are marked with ■ (\*\*\*) P < 0.001,  
220 determined by Student's T-test).

221

222 As there is a sharp oxygen gradient present in biofilm macrocolonies (37), O<sub>2</sub> might also  
223 have an impact on the expression of genes active in biofilms. Although there is no hint for an  
224 FNR-like, ANR, or DNR regulator binding site in the promoter region, we tested *nbdA*  
225 promoter activity also under anaerobic conditions. Induction of the *nbdA* promoter was  
226 observed when cultures reached stationary phase in all tested strains, similarly to the aerobic  
227 growth conditions (Fig. 3). Overall, the values for promoter activity under oxygen limitation  
228 were significantly lower than in aerobic conditions. The *nbdA* promoter activity in the *amrZ*  
229 deletion strain was significantly increased compared to the wild-type background. Therefore,  
230 AmrZ seems to repress *nbdA* transcription similarly in aerobic and anaerobic growth  
231 conditions.

232

233



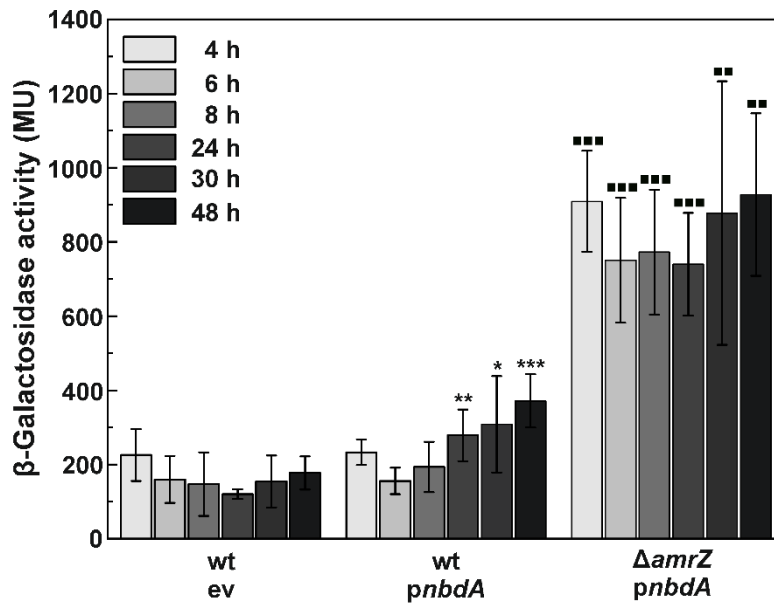

234

235 **Fig. 3:** Under oxygen limitation, transcription levels of *nbdA* are induced in stationary growth phase. PAO1 wt and  $\Delta amrZ$   
236 containing an integrated *pnbDA-lacZ* fusion and the empty vector control (ev) were grown anaerobically for 48 h in LB medium  
237 with 50 mM  $NaNO_3$ . Inoculation of cultures was performed aerobically therefore the first hours of growth were required to  
238 consume remaining oxygen. Expression levels were determined by  $\beta$ -galactosidase assays in triplicates. Significant changes in  
239 *nbdA* transcription levels of wt samples to the 6 h sample are marked with \*. Significant changes in *nbdA* transcription level of  
240  $\Delta amrZ$  samples to corresponding wt levels are marked with ■. (\*  $P < 0.05$ ; \*\*  $P < 0.01$ ; \*\*\*  $P < 0.001$ , determined by Student's T-  
241 test).

242

### 243 **Impact of nitric oxide on the transcription of *nbdA***

244 We previously reported increased amounts of *nbdA* transcript in dispersed cells after NO-  
245 induced biofilm dispersal compared to untreated planktonic cells and suggested a NO-  
246 dependent transcriptional regulation of *nbdA* (23). In the light of divergent results on the role  
247 of *nbdA* in NO-induced biofilm dispersion (23, 26) we wanted to clarify the regulation of *nbdA*  
248 in response to endogenous and exogenous NO. During infections, host macrophages  
249 release exogenous NO in order to eradicate bacteria (38). However, under anaerobic  
250 conditions, *P. aeruginosa* is able to form endogenous NO during denitrification. Within the  
251 denitrification process, nitrite is reduced by the nitrite reductase NirS into NO, which is then  
252 further reduced to nitrous oxide by NorCB (39, 40). For its enzymatic activity, NirS requires  
253 the incorporation of a heme d<sub>1</sub> cofactor which is synthesized by NirF (41). Interruption of the  
254 denitrification pathway by deletion of the *norCB* gene leads to the accumulation of intrinsic  
255 NO under denitrifying conditions (4). A  $\Delta norCB$  strain containing the *nbdA* promoter *lacZ*-  
256 fusion was used to analyze the effect of endogenous NO on *nbdA* transcription. Deletion  
257 mutants of *nirS* and *nirF*, both unable to form endogenous NO, served as negative controls.  
258 The denitrification deficient strains showed normal growth under aerobic conditions in LB  
259 medium complemented with  $KNO_3$  (Fig. 4A). In contrast, under anaerobic denitrifying  
260 conditions the growth of PAO1  $\Delta nirS$  and  $\Delta nirF$  was reduced compared to the wt PAO1 (Fig.  
261 4B). The  $\Delta norCB$  strain was no longer able to grow. For the analysis of *nbdA* transcription,  
262 the strains containing the *nbdA* promoter *lacZ*-fusion were grown under aerobic/microaerobic  
263 conditions and  $\beta$ -galactosidase assays were performed with samples of the exponential (4 h)  
264 and early stationary growth phase (7 h) (Fig. 4C). Compared to the wt, the *nirS* deletion had  
265 a severe activating effect on *nbdA* expression in both, exponential and early stationary  
266 growth phase. Surprisingly, *nbdA* transcription in the  $\Delta nirF$  strain, which produces an  
267 enzymatically inactive NirS, was not as high as in the  $\Delta nirS$  strain but comparable to the level  
268 of transcription in the wt background. The transcription of *nbdA* in the  $\Delta norCB$  strain is

269 slightly decreased compared to the wt background. Due to the impaired growth in anaerobic  
 270 conditions of  $\Delta norCB$  strain, we could not test for the effect of accumulation of endogenous  
 271 NO on *nbdA* transcription. In order to confirm the findings for the  $\Delta nirS$  strain, a semi  
 272 quantitative RT-PCR experiment was performed with cDNA of wt and deletion mutant in both  
 273 tested growth phases (Fig. 4D). While the control PCR with *recA* primers showed equally  
 274 strong bands for all samples, *nbdA* expression in the wt in exponential growth phase was  
 275 weaker than in early stationary growth phase. In the *nirS* deletion strain, there was more  
 276 transcript of *nbdA* detectable than in wt, which is consistent to the findings of the  $\beta$ -  
 277 galactosidase assay.

278

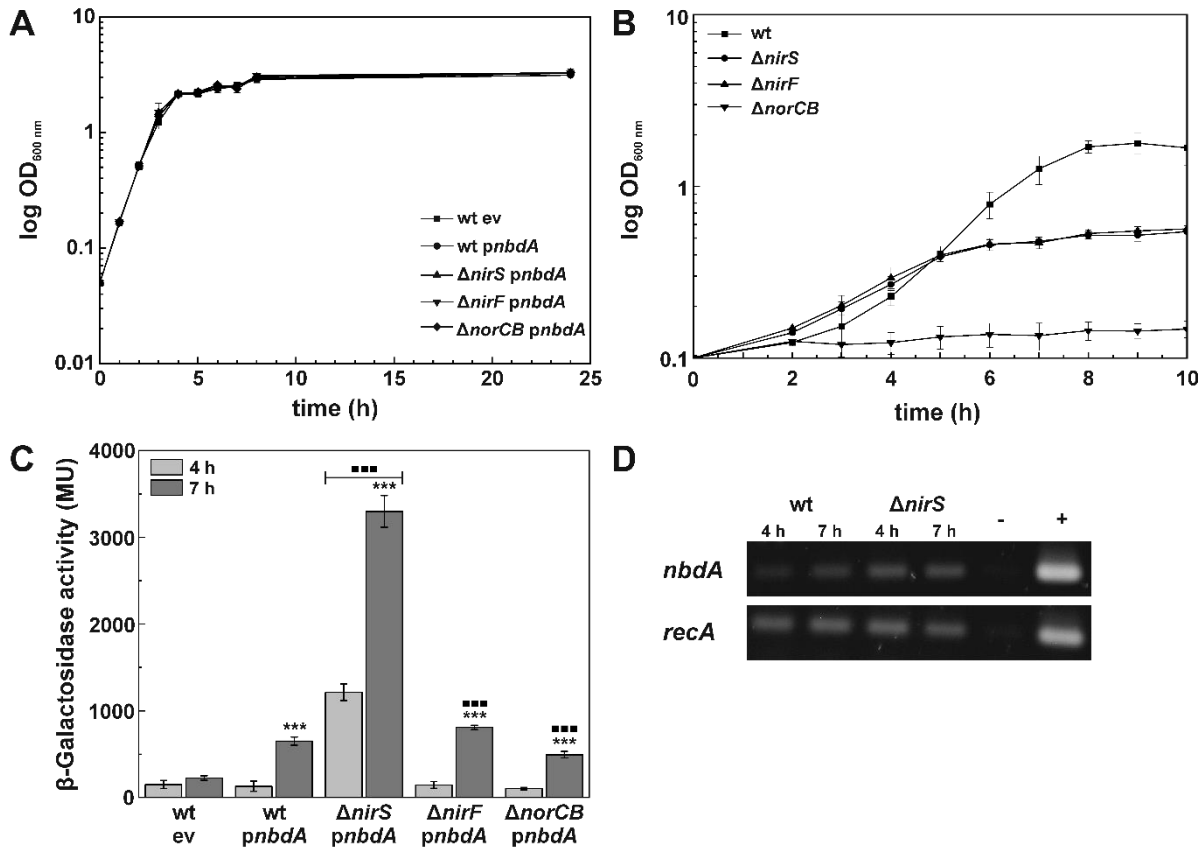

279  
 280  
 281 **Fig. 4:** *P. aeruginosa* wild type (wt),  $\Delta nirS$ ,  $\Delta nirF$ , and  $\Delta norCB$  strains harboring a transcriptional *pnbDA lacZ*-fusion and the wt  
 282 containing the "empty vector" control (ev) were grown in LB supplemented with 50 mM KNO<sub>3</sub>. [A] Growth in glass culture flasks  
 283 was monitored during 24 h in three biological replicates. [B] Anaerobic growth in LB medium supplemented with 50 mM KNO<sub>3</sub>  
 284 of the wt and deletion mutants was analyzed in sealed bottles for 10 h in biological triplicates. [C]  $\beta$ -galactosidase activity was  
 285 determined from cells aerobically/ microaerobically grown to exponential (4 h) and early stationary phase (7 h). All assays were  
 286 performed in triplicates. Significant changes between 4 and 7 h samples are marked with \*. Significant changes in *nbdA*  
 287 expression levels between deletion mutant strains and the corresponding wt sample are marked with ■. (\*\*\*) P < 0.001,  
 288 determined by Student's T-test). [D] Semi quantitative RT-PCR for *nbdA* transcript and the control *recA* was performed. RNA  
 289 was extracted from wt and  $\Delta nirS$  strains after 4 and 7 h growth in LB medium.

290 In addition to the influence of intrinsic nitric oxide on *nbdA* transcription, the effect of  
 291 exogenous NO was investigated. Therefore, the PAO1 wt harboring the *nbdA-lacZ* fusion  
 292 was grown with increasing amounts of the NO donor sodium nitroprusside (SNP) and *nbdA*  
 293 promoter activity was determined by  $\beta$ -galactosidase activity (Fig. 5A). Low concentration of  
 294 added SNP to the growth medium had no effect on *nbdA* promoter activity, whereas the  
 295 addition of 500  $\mu$ M SNP led to a decrease of *nbdA* transcription. This effect is comparable to  
 296 the observed decrease of *nbdA* transcription in the NO-accumulating strain  $\Delta norCB$ . As  
 297 *P. aeruginosa* is able to detoxify nitric oxide via flavohemoglobin (42, 43) under aerobic  
 298 conditions, the influence of short-term NO stress on *nbdA* transcription was analyzed.

299 Therefore, PAO1 wt *nbdA-lacZ* was grown to stationary phase in LB and then stressed for 30  
300 min by the addition of 500  $\mu$ M SNP. Compared to the untreated control, no changes in the  
301 *nbdA* promoter activity were observed (data not shown).

302

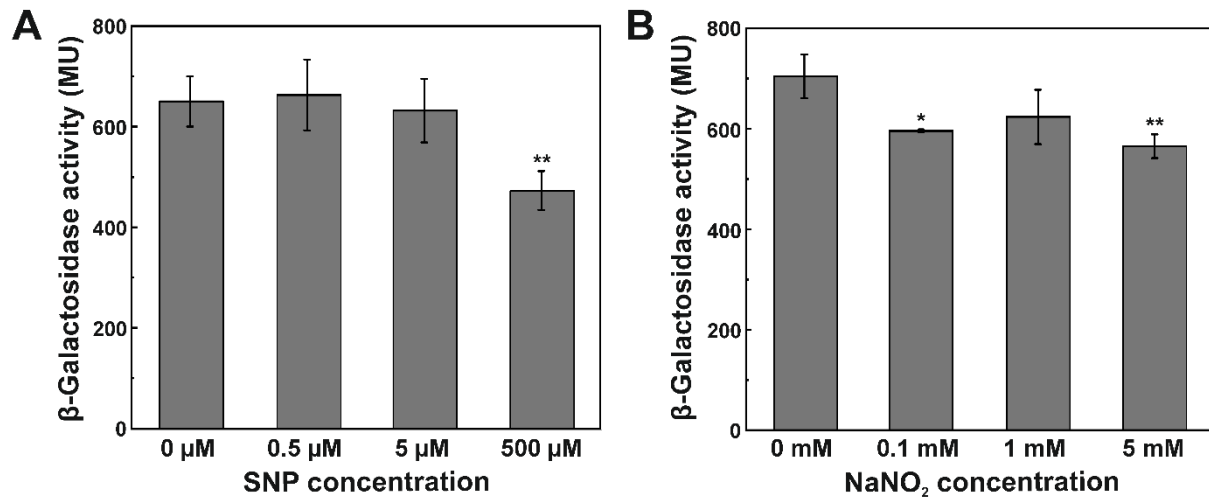

303

304 **Fig. 5:** Analysis of transcriptional activity of *nbdA* promoter in response to exogenic NO and NO<sub>2</sub> sources. Reporter strain PAO1  
305 wt::*nbdA-lacZ* was grown to early stationary phase (7 h) in medium containing increasing amounts of the NO-releasing  
306 compound sodium nitroprusside (SNP) [A] or NaNO<sub>2</sub> [B].  $\beta$ -galactosidase activity was measured in triplicates (\* P < 0.05; \*\* P <  
307 0.01, determined by Student's T-test).

308 In order to figure out whether the strong increase of *nbdA* expression in the  $\Delta$ *nirS* strain was  
309 based on nitrite accumulation due to interrupted denitrification (4),  $\beta$ -galactosidase assays  
310 were performed with different amounts of nitrite in the growth medium (Fig. 5B). None of the  
311 tested nitrite concentrations had a comparable effect on the *nbdA* promoter as the deletion of  
312 *nirS*. The addition of nitrite to the medium rather decreased expression of *nbdA* slightly,  
313 probably due to bacteriostatic effect of nitrite.

314

315

## 316 DISCUSSION

317 In this study we analyzed the transcriptional regulation of *nbdA* coding for the  
318 phosphodiesterase NbdA, involved in the c-di-GMP modulating network in *P. aeruginosa*.  
319 Determination of the transcription initiation site of *nbdA* by 5'-RACE revealed an erroneous  
320 annotation of the ORF in the databases. A new promoter region was identified, containing  
321 putative binding sites for RpoS and AmrZ. Gene expression of *nbdA* was shown to be  
322 activated in stationary growth phase by the alternative sigma factor RpoS ( $\sigma^S$ ). A further level  
323 of regulation is introduced through the repression by the ribbon-helix-helix transcription factor  
324 AmrZ. Oxygen limitation, supplementation with nitrite, and endogenous or exogenous nitric  
325 oxide did not affect the transcription of *nbdA*. Surprisingly, deletion of the nitrite reductase  
326 NirS showed a strong activating effect on *nbdA* transcription, while a strain with an  
327 enzymatically inactive NirS ( $\Delta nirF$ ) showed no transcriptional changes.

328 The sigma factor RpoS is known as the master regulator of gene expression during  
329 stationary growth phase. Furthermore, it is responsible for the activation of genes in  
330 response to different stresses, e.g. starvation, heat, oxygen or osmotic stress (44-46). In  
331 some Proteobacteria, RpoS is additionally involved in regulation of virulence genes, quorum  
332 sensing and motility (47-50). In *E. coli*, RpoS has been shown to play an important role in  
333 biofilm maturation, architecture and density (51-53). This link is partly due to the involvement  
334 of RpoS in the c-di-GMP regulatory network of *E. coli*. In the *E. coli* K12 strains MC4100 and  
335 W3110 a great subset of GGDEF/EAL-domain encoding genes was identified to be under  
336 control of RpoS (54, 55). Similarly, in *Pseudomonas* sp. several genes related to biofilm  
337 formation, maturation and architecture were shown to be regulated by RpoS (56, 57). A  
338 global analysis of *P. aeruginosa* PA14 revealed that 30 out of 40 genes encoding for c-di-  
339 GMP modulating enzymes, are either transcriptionally activated or repressed by RpoS (Table  
340 3 and references therein). Thus, similar to *E. coli*, RpoS-dependent regulation significantly  
341 affects the c-di-GMP network of *P. aeruginosa*. RpoS regulated genes are often subject to  
342 further regulatory mechanisms. Activator or repressor proteins might be involved, as well as  
343 post-transcriptional regulation. The *psl* operon coding for matrix polysaccharide biosynthesis  
344 genes in *P. aeruginosa* is controlled transcriptionally by RpoS and post-transcriptionally by  
345 RsmA (58). In *P. putida* KT2440 the exopolysaccharide cluster *pea* is activated by RpoS and  
346 repressed by AmrZ (59). Actually, when we evaluated and compared the data of the PA14  
347 RpoS regulon (35) and the PAO1 AmrZ regulon (34) we found 18 out of 40 genes encoding  
348 for c-di-GMP modulating enzymes in *P. aeruginosa* presumably regulated by both proteins,  
349 RpoS and AmrZ (Table 3, (34, 35)).

350 The transcriptional regulator AmrZ controls a large regulon containing 398 gene regions in  
351 PAO1. Transcription of *amrZ* itself is in a great extent dependent on the alternative sigma  
352 factor AlgT ( $\sigma^{22}$ ) which is known to regulate conversion to mucoidity and stress responses in  
353 *P. aeruginosa* (60, 61). AmrZ was shown to regulate genes important for *P. aeruginosa*  
354 virulence, including type IV pili, extracellular polysaccharides, and the flagellum (34). It  
355 particularly influences genes required for alginate production and twitching-motility (34, 62-  
356 64). Within the c-di-GMP network of *P. aeruginosa*, AmrZ activates transcription of 14 genes  
357 and represses 10 genes encoding GGDEF/EAL-domain proteins ((34), Table 3). With these  
358 numbers, AmrZ appears to be one of the major regulators for genes coding for c-di-GMP  
359 modulating enzymes in *P. aeruginosa*, possibly affecting the cellular c-di-GMP level. This  
360 role for AmrZ was previously also observed in *P. fluorescens* F113, where the cellular c-di-  
361 GMP level was affected by AmrZ through the regulation of a complex network of genes  
362 encoding DGCs and PDEs (65). From our work we conclude that *nbdA* transcription is  
363 repressed by AmrZ during aerobic as well as anaerobic planktonic growth while a condition  
364 in which the *nbdA* promoter is de-repressed remains uncertain. Repression through AmrZ is  
365 described to be dependent on the C-terminus mediated tetramerization of the protein (66). In

366 some cases, e.g. *pilA* repression, the expression level of AmrZ plays an important role for its  
 367 function, as binding efficiency of AmrZ to different promoter regions differs (64). Additionally,  
 368 a competition of the activator RpoS and the repressor AmrZ upon binding to the *ncdA*  
 369 promoter might be possible.

370 **Table 3: Genes coding for c-di-GMP modulating proteins in PAO1 and PA14 and their association to RpoS or AmrZ**  
 371 **regulon. Data extracted from Schulz 2015, and Jones 2014.**

372 RpoS regulon was analyzed in *P. aeruginosa* PA14 via mRNA profiling of  $\Delta rpoS$  vs. wt (35). AmrZ regulon was measured via  
 373 RNA-Seq experiments in a PAO1 *amrZ* complementation strain vs.  $\Delta amrZ$  (34). GGDEF: diguanylate cyclase domain, EAL:  
 374 phosphodiesterase domain, GGDEF-EAL: tandem diguanylate cyclase – phosphodiesterase domain, HD-GYP  
 375 phosphodiesterase domain.  
 376 + activation; - repression; none: is not part of the indicated regulon.

| PAO1<br>gene locus | PA14<br>gene locus | name               | domain(s)        | RpoS regulation | AmrZ regulation |
|--------------------|--------------------|--------------------|------------------|-----------------|-----------------|
| PA0169             | PA14_02110         | <i>siaD</i>        | GGDEF            | -               | -               |
| PA0285             | PA14_03720         |                    | GGDEF-EAL        | none            | -               |
| PA0290             | PA14_03790         |                    | GGDEF            | none            | none            |
| PA0338             | PA14_04420         |                    | GGDEF            | -               | -               |
| PA0575             | PA14_07500         | <i>rmcA</i>        | GGDEF-EAL        | +               | none            |
| PA0847             | PA14_53310         |                    | GGDEF            | +               | none            |
| PA0861             | PA14_53140         | <i>rbdA</i>        | GGDEF-EAL        | +               | none            |
| PA1107             | PA14_50060         | <i>roeA</i>        | GGDEF            | +               | -               |
| PA1120             | PA14_49890         | <i>tpbB</i>        | GGDEF            | +               | none            |
| PA1181             | PA14_49160         |                    | GGDEF-EAL        | +               | +               |
| PA1433             | PA14_45930         |                    | GGDEF-EAL        | +               | none            |
| PA1727             | PA14_42220         | <i>mucR</i>        | GGDEF-EAL        | +               | -               |
| PA1851             | PA14_40570         |                    | GGDEF            | +               | none            |
| PA2072             | PA14_37690         |                    | GGDEF-EAL        | +               | +               |
| PA2133             | PA14_36990         |                    | EAL              | +               | none            |
| PA2200             | PA14_36260         |                    | EAL              | +               | none            |
| PA2567             | PA14_31330         |                    | GGDEF-EAL        | none            | -               |
| PA2572             | PA14_30830         |                    | HD-GYP           | +               | +               |
| PA2870             | PA14_26970         |                    | GGDEF            | +               | +               |
| PA3177             | PA14_23130         |                    | GGDEF            | none            | +               |
| PA3258             | PA14_21870         |                    | GGDEF-EAL        | none            | none            |
| <b>PA3311</b>      | <b>PA14_21190</b>  | <b><i>ncdA</i></b> | <b>GGDEF-EAL</b> | <b>+</b>        | <b>-</b>        |
| PA3343             | PA14_20820         | <i>hsbD</i>        | GGDEF            | +               | -               |
| PA3702             | PA14_16500         | <i>wspR</i>        | GGDEF            | +               | +               |
| PA3825             | PA14_14530         |                    | EAL              | +               | +               |
| PA3947             | PA14_12810         | <i>rocR</i>        | EAL              | +               | none            |
| PA4108             | PA14_10820         |                    | HD-GYP           | +               | none            |
| PA4332             | PA14_56280         | <i>sadC</i>        | GGDEF            | none            | -               |
| PA4367             | PA14_56790         | <i>bifA</i>        | GGDEF-EAL        | +               | -               |
| PA4396             | PA14_57140         |                    | GGDEF            | none            | none            |
| PA4601             | PA14_60870         | <i>morA</i>        | GGDEF-EAL        | +               | -               |
| PA4781             | PA14_63210         |                    | HD-GYP           | +               | +               |
| PA4843             | PA14_64050         | <i>gcbA</i>        | GGDEF            | none            | +               |
| PA4929             | PA14_65090         |                    | GGDEF            | +               | -               |
| PA4959             | PA14_65540         | <i>fimX</i>        | GGDEF-EAL        | +               | +               |
| PA5017             | PA14_66320         | <i>dipA</i>        | GGDEF-EAL        | none            | -               |
| PA5295             | PA14_69900         | <i>proE</i>        | GGDEF-EAL        | +               | none            |
| PA5442             | PA14_71850         |                    | GGDEF-EAL        | -               | -               |
| PA5487             | PA14_72420         | <i>dgcH</i>        | GGDEF            | +               | none            |
| *                  | PA14_59790         | <i>pvrR</i>        | EAL              | none            | none            |

377 \* gene not present in PAO1

378

### 379 Effects of endogenous or exogenous nitric oxide on *ncdA* expression

380 In our previous study we observed elevated transcription levels of *ncdA* in cells dispersed  
 381 from biofilms after NO-treatment when compared to planktonically grown cells in RT-qPCR  
 382 experiments (23). Therefore, we suggested transcriptional regulation of *ncdA* by NO in this  
 383 biofilm model. For *P. aeruginosa* two NO-responsive transcriptional regulators, FhpR and  
 384 DNR are described. DNR is a heme-containing CRP/FNR type regulator that specifically  
 385 activates denitrification genes under anaerobic conditions (67, 68). Transcription of the

386 second NO responsive regulator in *P. aeruginosa*, FhpR, is  $\sigma^{54}$ -dependent and activates  
387 flavohemoglobin expression under aerobic conditions for the detoxification of NO in the cell  
388 (42, 43). When analyzing the reannotated *nbdA* gene and promoter region, no similarity with  
389 either the FhpR or DNR consensus binding site was detected (69). Therefore, a direct  
390 influence of NO on *nbdA* transcription was unlikely. These findings in addition to the  
391 contradictory results in the literature concerning the involvement of NbdA in NO-induced  
392 biofilm dispersal of *P. aeruginosa* (23, 26) led to the reevaluation of the transcriptional  
393 regulation of *nbdA* by NO. In this study, no direct stimulation of *nbdA* promoter activity by  
394 NO, neither by addition of exogenous NO nor by accumulation of intrinsic NO in  
395 planktonically grown cells was observed. The previously observed induction of *nbdA*  
396 expression in our qRT-PCR experiments (23) might be due to more complex regulatory  
397 processes during biofilm formation and dispersal. From the present data, we conclude that  
398 *nbdA* expression in planktonic cells is not directly induced by NO at the transcriptional level.

### 399 **Effect of the nitrite reductase NirS on *nbdA* promoter activity**

400 In this study, we observed a strong increase in the *nbdA* transcription level when the nitrite  
401 reductase NirS was deleted. At first, we assumed that the upregulation of *nbdA* expression  
402 might be due to accumulation of intrinsic nitrite from interrupted denitrification. However,  
403 addition of nitrite to the growth medium did not change *nbdA* promoter activity. Further, the  
404  $\Delta nirF$  strain producing an enzymatically inactive NirS protein (41) did not enhance *nbdA*  
405 transcription. Therefore, we suggest that the presence of the periplasmic protein NirS affects  
406 *nbdA* transcription independently of its enzymatic activity. The moonlighting role of NirS was  
407 previously described for the type III secretion system in *P. aeruginosa* (70). Additionally, NirS  
408 was shown to affect flagellum biogenesis by the formation of a complex with the flagellar  
409 subunit FlhC and the chaperone DnaK (4, 60, 71). Suggesting this complex role for NirS  
410 besides denitrification in *P. aeruginosa*, the increase of *nbdA* promoter activity in the  $\Delta nirS$   
411 strain is probably derived from a global regulatory change in the cell.

412 All in all, we were able to reannotate the *nbdA* gene and revealed consensus sequences for  
413 the alternative sigma factor RpoS and the transcription factor AmrZ within the *nbdA* promoter  
414 region. Our data confirmed RpoS as activator and AmrZ as repressor for *nbdA* transcription,  
415 however, no transcriptional regulation by endogenous or exogenous NO or nitrite was  
416 observed in planktonically grown cells.

417

## 418 **AUTHORS STATEMENTS**

### 419 **Authors and contributors**

420 KG, SZ, NFD conceived the study, KG and SZ performed experiments, KG and SZ analyzed  
421 the data, KG wrote first draft of manuscript, all authors revised and approved the final version  
422 of the manuscript.

### 423 **Conflict of interests**

424 The authors declare no conflict of interest.

### 425 **Funding information**

426 This work was funded by the SPP 1879 “Nucleotide Second Messenger Signaling in  
427 Bacteria” of the DFG.

### 428 **Acknowledgements**

429 We thank Sandra Schwarz (Tübingen, Germany) for the generous gift of the plasmid pEXG2.

## 430 REFERENCES

- 431 1. **Costerton JW, Stewart PS, Greenberg EP.** Bacterial biofilms: a common cause of persistent  
432 infections. *Science*. 1999;284(5418):1318-22. doi:[10.1126/science.284.5418.1318](https://doi.org/10.1126/science.284.5418.1318)
- 433 2. **del Pozo JL, Patel R.** The challenge of treating biofilm-associated bacterial infections. *Clinical*  
434 *Pharmacology & Therapeutics*. 2007;82(2):204-9. doi:[10.1038/sj.clpt.6100247](https://doi.org/10.1038/sj.clpt.6100247)
- 435 3. **Leid JG, Willson CJ, Shirtliff ME, Hassett DJ, Parsek MR, Jeffers AK.** The exopolysaccharide  
436 alginate protects *Pseudomonas aeruginosa* biofilm bacteria from IFN-gamma-mediated macrophage  
437 killing. *Journal of Immunology*. 2005;175(11):7512-8. doi:[10.4049/jimmunol.175.11.7512](https://doi.org/10.4049/jimmunol.175.11.7512)
- 438 4. **Barraud N, Hassett DJ, Hwang SH, Rice SA, Kjelleberg S, Webb JS.** Involvement of nitric oxide  
439 in biofilm dispersal of *Pseudomonas aeruginosa*. *Journal of Bacteriology*. 2006;188(21):7344-53.  
440 doi:[10.1128/JB.00779-06](https://doi.org/10.1128/JB.00779-06)
- 441 5. **Huynh TT, McDougald D, Klebensberger J, Al Qarni B, Barraud N, Rice SA, et al.** Glucose  
442 starvation-induced dispersal of *Pseudomonas aeruginosa* biofilms is cAMP and energy dependent.  
443 *PLoS One*. 2012;7(8):e42874. doi:[10.1371/journal.pone.0042874](https://doi.org/10.1371/journal.pone.0042874)
- 444 6. **Sauer K, Cullen MC, Rickard AH, Zeef LA, Davies DG, Gilbert P.** Characterization of nutrient-  
445 induced dispersion in *Pseudomonas aeruginosa* PAO1 biofilm. *Journal of Bacteriology*.  
446 2004;186(21):7312-26. doi:[10.1128/JB.186.21.7312-7326.2004](https://doi.org/10.1128/JB.186.21.7312-7326.2004)
- 447 7. **Sondermann H, Shikuma NJ, Yildiz FH.** You've come a long way: c-di-GMP signaling. *Current*  
448 *Opinion in Microbiology*. 2012;15(2):140-6. doi:[10.1016/j.mib.2011.12.008](https://doi.org/10.1016/j.mib.2011.12.008)
- 449 8. **Paul R, Weiser S, Amiot NC, Chan C, Schirmer T, Giese B, et al.** Cell cycle-dependent dynamic  
450 localization of a bacterial response regulator with a novel di-guanylate cyclase output domain. *Genes*  
451 *& Development*. 2004;18(6):715-27. doi:[10.1101/gad.289504](https://doi.org/10.1101/gad.289504)
- 452 9. **Rao F, Yang Y, Qi Y, Liang ZX.** Catalytic mechanism of cyclic di-GMP-specific  
453 phosphodiesterase: a study of the EAL domain-containing RocR from *Pseudomonas aeruginosa*.  
454 *Journal of Bacteriology*. 2008;190(10):3622-31. doi:[10.1128/JB.00165-08](https://doi.org/10.1128/JB.00165-08)
- 455 10. **Ryjenkov DA, Tarutina M, Moskvina OV, Gomelsky M.** Cyclic diguanylate is a ubiquitous  
456 signaling molecule in bacteria: insights into biochemistry of the GGDEF protein domain. *Journal of*  
457 *Bacteriology*. 2005;187(5):1792-8. doi:[10.1128/JB.187.5.1792-1798.2005](https://doi.org/10.1128/JB.187.5.1792-1798.2005)
- 458 11. **Stelitano V, Giardina G, Paiardini A, Castiglione N, Cutruzzola F, Rinaldo S.** C-di-GMP  
459 hydrolysis by *Pseudomonas aeruginosa* HD-GYP phosphodiesterases: analysis of the reaction  
460 mechanism and novel roles for pGpG. *PLoS One*. 2013;8(9):e74920.  
461 doi:[10.1371/journal.pone.0074920](https://doi.org/10.1371/journal.pone.0074920)
- 462 12. **Tchigvintsev A, Xu X, Singer A, Chang C, Brown G, Proudfoot M, et al.** Structural insight into  
463 the mechanism of c-di-GMP hydrolysis by EAL domain phosphodiesterases. *Journal of Molecular*  
464 *Biology*. 2010;402(3):524-38. doi:[10.1016/j.jmb.2010.07.050](https://doi.org/10.1016/j.jmb.2010.07.050)
- 465 13. **Hengge R.** Principles of c-di-GMP signalling in bacteria. *Nature Reviews Microbiology*.  
466 2009;7(4):263-73. doi:[10.1038/nrmicro2109](https://doi.org/10.1038/nrmicro2109)
- 467 14. **Jonas K, Edwards AN, Simm R, Romeo T, Romling U, Melefors O.** The RNA binding protein  
468 CsrA controls cyclic di-GMP metabolism by directly regulating the expression of GGDEF proteins.  
469 *Molecular Microbiology*. 2008;70(1):236-57. doi:[10.1111/j.1365-2958.2008.06411.x](https://doi.org/10.1111/j.1365-2958.2008.06411.x)
- 470 15. **Moscato JA, Jaeger T, Valentini M, Hui K, Jenal U, Filloux A.** The diguanylate cyclase SadC is  
471 a central player in Gac/Rsm-mediated biofilm formation in *Pseudomonas aeruginosa*. *Journal of*  
472 *Bacteriology*. 2014;196(23):4081-8. doi:[10.1128/JB.01850-14](https://doi.org/10.1128/JB.01850-14)
- 473 16. **Bellini D, Horrell S, Hutchin A, Phippen CW, Strange RW, Cai Y, et al.** Dimerisation induced  
474 formation of the active site and the identification of three metal sites in EAL-phosphodiesterases.  
475 *Scientific Reports*. 2017;7:42166. doi:[10.1038/srep42166](https://doi.org/10.1038/srep42166)
- 476 17. **An S, Wu J, Zhang LH.** Modulation of *Pseudomonas aeruginosa* biofilm dispersal by a cyclic-  
477 Di-GMP phosphodiesterase with a putative hypoxia-sensing domain. *Applied and Environmental*  
478 *Microbiology*. 2010;76(24):8160-73. doi:[10.1128/AEM.01233-10](https://doi.org/10.1128/AEM.01233-10)
- 479 18. **Wassmann P, Chan C, Paul R, Beck A, Heerklotz H, Jenal U, et al.** Structure of BeF3- -  
480 modified response regulator PleD: implications for diguanylate cyclase activation, catalysis, and  
481 feedback inhibition. *Structure*. 2007;15(8):915-27. doi:[10.1016/j.str.2007.06.016](https://doi.org/10.1016/j.str.2007.06.016)

- 482 19. **Tuckerman JR, Gonzalez G, Sousa EH, Wan X, Saito JA, Alam M, et al.** An oxygen-sensing  
483 diguanylate cyclase and phosphodiesterase couple for c-di-GMP control. *Biochemistry*.  
484 2009;48(41):9764-74. doi:[10.1021/bi901409g](https://doi.org/10.1021/bi901409g)
- 485 20. **Paiardini A, Mantoni F, Giardina G, Paone A, Janson G, Leoni L, et al.** A novel bacterial l-  
486 arginine sensor controlling c-di-GMP levels in *Pseudomonas aeruginosa*. *Proteins*. 2018;86(10):1088-  
487 96. doi:[10.1002/prot.25587](https://doi.org/10.1002/prot.25587)
- 488 21. **Sarenko O, Klauck G, Wilke FM, Pfiffer V, Richter AM, Herbst S, et al.** More than Enzymes  
489 That Make or Break Cyclic Di-GMP-Local Signaling in the Interactome of GGDEF/EAL Domain Proteins  
490 of *Escherichia coli*. *mBio*. 2017;8(5). doi:[10.1128/mBio.01639-17](https://doi.org/10.1128/mBio.01639-17)
- 491 22. **Kulasakara H, Lee V, Brencic A, Liberati N, Urbach J, Miyata S, et al.** Analysis of  
492 *Pseudomonas aeruginosa* diguanylate cyclases and phosphodiesterases reveals a role for bis-(3'-5')-  
493 cyclic-GMP in virulence. *Proceedings of the National Academy of Sciences of the United States of*  
494 *America*. 2006;103(8):2839-44. doi:[10.1073/pnas.0511090103](https://doi.org/10.1073/pnas.0511090103)
- 495 23. **Li Y, Heine S, Entian M, Sauer K, Frankenberg-Dinkel N.** NO-induced biofilm dispersion in  
496 *Pseudomonas aeruginosa* is mediated by an MHYT domain-coupled phosphodiesterase. *Journal of*  
497 *Bacteriology*. 2013;195(16):3531-42. doi:[10.1128/JB.01156-12](https://doi.org/10.1128/JB.01156-12)
- 498 24. **Galperin MY, Gaidenko TA, Mulikidjanian AY, Nakano M, Price CW.** MHYT, a new integral  
499 membrane sensor domain. *FEMS Microbiology Letters*. 2001;205(1):17-23. doi:[10.1111/j.1574-  
500 6968.2001.tb10919.x](https://doi.org/10.1111/j.1574-6968.2001.tb10919.x)
- 501 25. **Roy AB, Petrova OE, Sauer K.** The phosphodiesterase DipA (PA5017) is essential for  
502 *Pseudomonas aeruginosa* biofilm dispersion. *Journal of Bacteriology*. 2012;194(11):2904-15.  
503 doi:[10.1128/JB.05346-11](https://doi.org/10.1128/JB.05346-11)
- 504 26. **Zemke AC, D'Amico EJ, Snell EC, Torres AM, Kasturiarachi N, Bomberger JM.** Dispersal of  
505 Epithelium-Associated *Pseudomonas aeruginosa* Biofilms. *mSphere*. 2020;5(4).  
506 doi:[10.1128/mSphere.00630-20](https://doi.org/10.1128/mSphere.00630-20)
- 507 27. **Hanahan D.** Studies on transformation of *Escherichia coli* with plasmids. *Journal of Molecular*  
508 *Biology*. 1983;166(4):557-80. doi:[10.1016/s0022-2836\(83\)80284-8](https://doi.org/10.1016/s0022-2836(83)80284-8)
- 509 28. **de Lorenzo V, Timmis KN.** Analysis and construction of stable phenotypes in gram-negative  
510 bacteria with Tn5- and Tn10-derived minitransposons. *Methods in Enzymology*. 1994;235:386-405.  
511 doi:[10.1016/0076-6879\(94\)35157-0](https://doi.org/10.1016/0076-6879(94)35157-0)
- 512 29. **Rietsch A, Vallet-Gely I, Dove SL, Mekalanos JJ.** ExsE, a secreted regulator of type III  
513 secretion genes in *Pseudomonas aeruginosa*. *Proceedings of the National Academy of Sciences of the*  
514 *United States of America*. 2005;102(22):8006-11. doi:[10.1073/pnas.0503005102](https://doi.org/10.1073/pnas.0503005102)
- 515 30. **Becher A, Schweizer HP.** Integration-proficient *Pseudomonas aeruginosa* vectors for isolation  
516 of single-copy chromosomal *lacZ* and *lux* gene fusions. *Biotechniques*. 2000;29(5):948-50, 52.  
517 doi:[10.2144/00295bm04](https://doi.org/10.2144/00295bm04)
- 518 31. **Hmelo LR, Borlee BR, Almlblad H, Love ME, Randall TE, Tseng BS, et al.** Precision-engineering  
519 the *Pseudomonas aeruginosa* genome with two-step allelic exchange. *Nature Protocols*.  
520 2015;10(11):1820-41. doi:[10.1038/nprot.2015.115](https://doi.org/10.1038/nprot.2015.115)
- 521 32. **Miller JH.** Experiments in molecular genetics. Cold Spring Harbor: *Cold Spring Harbor*  
522 *Laboratory Press*; 1972.
- 523 33. **Hauser F, Pessi G, Friberg M, Weber C, Rusca N, Lindemann A, et al.** Dissection of the  
524 *Bradyrhizobium japonicum* NifA+sigma54 regulon, and identification of a ferredoxin gene (*fdxN*) for  
525 symbiotic nitrogen fixation. *Molecular Genetics and Genomics*. 2007;278(3):255-71.  
526 doi:[10.1007/s00438-007-0246-9](https://doi.org/10.1007/s00438-007-0246-9)
- 527 34. **Jones CJ, Newsom D, Kelly B, Irie Y, Jennings LK, Xu B, et al.** ChIP-Seq and RNA-Seq reveal an  
528 AmrZ-mediated mechanism for cyclic di-GMP synthesis and biofilm development by *Pseudomonas*  
529 *aeruginosa*. *PLoS Pathogens*. 2014;10(3):e1003984. doi:[10.1371/journal.ppat.1003984](https://doi.org/10.1371/journal.ppat.1003984)
- 530 35. **Schulz S, Eckweiler D, Bielecka A, Nicolai T, Franke R, Dotsch A, et al.** Elucidation of sigma  
531 factor-associated networks in *Pseudomonas aeruginosa* reveals a modular architecture with limited  
532 and function-specific crosstalk. *PLoS Pathogens*. 2015;11(3):e1004744.  
533 doi:[10.1371/journal.ppat.1004744](https://doi.org/10.1371/journal.ppat.1004744)



- 534 36. **Winsor GL, Griffiths EJ, Lo R, Dhillon BK, Shay JA, Brinkman FS.** Enhanced annotations and  
535 features for comparing thousands of *Pseudomonas* genomes in the *Pseudomonas* genome database.  
536 *Nucleic Acids Research*. 2016;44(D1):D646-53. doi:[10.1093/nar/gkv1227](https://doi.org/10.1093/nar/gkv1227)
- 537 37. **James GA, Ge Zhao A, Usui M, Underwood RA, Nguyen H, Beyenal H, et al.** Microsensor and  
538 transcriptomic signatures of oxygen depletion in biofilms associated with chronic wounds. *Wound*  
539 *Repair and Regeneration*. 2016;24(2):373-83. doi:[10.1111/wrr.12401](https://doi.org/10.1111/wrr.12401)
- 540 38. **Denis M.** Human monocytes/macrophages: NO or no NO? *Journal of Leukocyte Biology*.  
541 1994;55(5):682-4. doi:[10.1002/jlb.55.5.682](https://doi.org/10.1002/jlb.55.5.682)
- 542 39. **Cutruzzola F, Frankenberg-Dinkel N.** Origin and Impact of Nitric Oxide in *Pseudomonas*  
543 *aeruginosa* Biofilms. *Journal of Bacteriology*. 2016;198(1):55-65. doi:[10.1128/JB.00371-15](https://doi.org/10.1128/JB.00371-15)
- 544 40. **Ye RW, Averill BA, Tiedje JM.** Denitrification: production and consumption of nitric oxide.  
545 *Applied and Environmental Microbiology*. 1994;60(4):1053-8. doi:[10.1128/AEM.60.4.1053-1058.1994](https://doi.org/10.1128/AEM.60.4.1053-1058.1994)
- 546 41. **Nicke T, Schnitzer T, Munch K, Adamczack J, Haufschildt K, Buchmeier S, et al.** Maturation of  
547 the cytochrome cd1 nitrite reductase NirS from *Pseudomonas aeruginosa* requires transient  
548 interactions between the three proteins NirS, NirN and NirF. *Bioscience Reports*. 2013;33(3).  
549 doi:[10.1042/BSR20130043](https://doi.org/10.1042/BSR20130043)
- 550 42. **Arai HH, M.; Kuroi, A.; Ishii, M.; Igarashi, Y.** Transcriptional regulation of the  
551 flavohemoglobin gene for aerobic nitric oxide detoxification by the second nitric oxide-responsive  
552 regulator of *Pseudomonas aeruginosa*. *Journal of Bacteriology*. 2005;187(12):3960-8.  
553 doi:[10.1128/JB.187.12.3960-3968.2005](https://doi.org/10.1128/JB.187.12.3960-3968.2005)
- 554 43. **Forrester MT, Foster MW.** Protection from nitrosative stress: a central role for microbial  
555 flavohemoglobin. *Free Radical Biology and Medicine*. 2012;52(9):1620-33.  
556 doi:[10.1016/j.freeradbiomed.2012.01.028](https://doi.org/10.1016/j.freeradbiomed.2012.01.028)
- 557 44. **Fujita M, Tanaka K, Takahashi H, Amemura A.** Transcription of the principal sigma-factor  
558 genes, *rpoD* and *rpoS*, in *Pseudomonas aeruginosa* is controlled according to the growth phase.  
559 *Molecular Microbiology*. 1994;13(6):1071-7. doi:[10.1111/j.1365-2958.1994.tb00498.x](https://doi.org/10.1111/j.1365-2958.1994.tb00498.x)
- 560 45. **Jorgensen F, Bally M, Chapon-Herve V, Michel G, Lazdunski A, Williams P, et al.** RpoS-  
561 dependent stress tolerance in *Pseudomonas aeruginosa*. *Microbiology (Reading)*. 1999;145 ( Pt  
562 4):835-44. doi:[10.1099/13500872-145-4-835](https://doi.org/10.1099/13500872-145-4-835)
- 563 46. **Landini P, Egli T, Wolf J, Lacour S.** sigmaS, a major player in the response to environmental  
564 stresses in *Escherichia coli*: role, regulation and mechanisms of promoter recognition. *Environmental*  
565 *Microbiology Reports*. 2014;6(1):1-13. doi:[10.1111/1758-2229.12112](https://doi.org/10.1111/1758-2229.12112)
- 566 47. **Dong T, Schellhorn HE.** Role of RpoS in virulence of pathogens. *Infection and Immunity*.  
567 2010;78(3):887-97. doi:[10.1128/IAI.00882-09](https://doi.org/10.1128/IAI.00882-09)
- 568 48. **Guan J, Xiao X, Xu S, Gao F, Wang J, Wang T, et al.** Roles of RpoS in *Yersinia*  
569 *pseudotuberculosis* stress survival, motility, biofilm formation and type VI secretion system  
570 expression. *Journal of Microbiology*. 2015;53(9):633-42. doi:[10.1007/s12275-015-0099-6](https://doi.org/10.1007/s12275-015-0099-6)
- 571 49. **Tian Y, Wang Q, Liu Q, Ma Y, Cao X, Zhang Y.** Role of RpoS in stress survival, synthesis of  
572 extracellular autoinducer 2, and virulence in *Vibrio alginolyticus*. *Archives of Microbiology*.  
573 2008;190(5):585-94. doi:[10.1007/s00203-008-0410-6](https://doi.org/10.1007/s00203-008-0410-6)
- 574 50. **Yildiz FH, Schoolnik GK.** Role of *rpoS* in stress survival and virulence of *Vibrio cholerae*.  
575 *Journal of Bacteriology*. 1998;180(4):773-84. doi:[10.1128/JB.180.4.773-784.1998](https://doi.org/10.1128/JB.180.4.773-784.1998)
- 576 51. **Adams JL, McLean RJ.** Impact of *rpoS* deletion on *Escherichia coli* biofilms. *Applied and*  
577 *Environmental Microbiology*. 1999;65(9):4285-7. doi:[10.1128/AEM.65.9.4285-4287.1999](https://doi.org/10.1128/AEM.65.9.4285-4287.1999)
- 578 52. **Ito A, May T, Kawata K, Okabe S.** Significance of *rpoS* during maturation of *Escherichia coli*  
579 biofilms. *Biotechnology and Bioengineering*. 2008;99(6):1462-71. doi:[10.1002/bit.21695](https://doi.org/10.1002/bit.21695)
- 580 53. **Mika F, Hengge R.** Small RNAs in the control of RpoS, CsgD, and biofilm architecture of  
581 *Escherichia coli*. *RNA Biology*. 2014;11(5):494-507. doi:[10.4161/rna.28867](https://doi.org/10.4161/rna.28867)
- 582 54. **Sommerfeldt N, Possling A, Becker G, Pesavento C, Tschowri N, Hengge R.** Gene expression  
583 patterns and differential input into curli fimbriae regulation of all GGDEF/EAL domain proteins in  
584 *Escherichia coli*. *Microbiology (Reading)*. 2009;155(Pt 4):1318-31. doi:[10.1099/mic.0.024257-0](https://doi.org/10.1099/mic.0.024257-0)

- 585 55. **Weber H, Pesavento C, Possling A, Tischendorf G, Hengge R.** Cyclic-di-GMP-mediated  
586 signalling within the sigma network of *Escherichia coli*. *Molecular Microbiology*. 2006;62(4):1014-34.  
587 doi:[10.1111/j.1365-2958.2006.05440.x](https://doi.org/10.1111/j.1365-2958.2006.05440.x)
- 588 56. **Heydorn A, Ersboll B, Kato J, Hentzer M, Parsek MR, Tolker-Nielsen T, et al.** Statistical  
589 analysis of *Pseudomonas aeruginosa* biofilm development: impact of mutations in genes involved in  
590 twitching motility, cell-to-cell signaling, and stationary-phase sigma factor expression. *Applied and*  
591 *Environmental Microbiology*. 2002;68(4):2008-17. doi:[10.1128/aem.68.4.2008-2017.2002](https://doi.org/10.1128/aem.68.4.2008-2017.2002)
- 592 57. **Whiteley M, Bangera MG, Bumgarner RE, Parsek MR, Teitzel GM, Lory S, et al.** Gene  
593 expression in *Pseudomonas aeruginosa* biofilms. *Nature*. 2001;413(6858):860-4.  
594 doi:[10.1038/35101627](https://doi.org/10.1038/35101627)
- 595 58. **Irie Y, Starkey M, Edwards AN, Wozniak DJ, Romeo T, Parsek MR.** *Pseudomonas aeruginosa*  
596 biofilm matrix polysaccharide Psl is regulated transcriptionally by RpoS and post-transcriptionally by  
597 RsmA. *Molecular Microbiology*. 2010;78(1):158-72. doi:[10.1111/j.1365-2958.2010.07320.x](https://doi.org/10.1111/j.1365-2958.2010.07320.x)
- 598 59. **Liu H, Yan H, Xiao Y, Nie H, Huang Q, Chen W.** The exopolysaccharide gene cluster *pea* is  
599 transcriptionally controlled by RpoS and repressed by AmrZ in *Pseudomonas putida* KT2440.  
600 *Microbiological Research*. 2019;218:1-11. doi:[10.1016/j.micres.2018.09.004](https://doi.org/10.1016/j.micres.2018.09.004)
- 601 60. **Borrero-de Acuna JM, Timmis KN, Jahn M, Jahn D.** Protein complex formation during  
602 denitrification by *Pseudomonas aeruginosa*. *Microbial Biotechnology*. 2017;10(6):1523-34.  
603 doi:[10.1111/1751-7915.12851](https://doi.org/10.1111/1751-7915.12851)
- 604 61. **Wozniak DJ, Sprinkle AB, Baynham PJ.** Control of *Pseudomonas aeruginosa algZ* expression  
605 by the alternative sigma factor AlgT. *Journal of Bacteriology*. 2003;185(24):7297-300.  
606 doi:[10.1128/jb.185.24.7297-7300.2003](https://doi.org/10.1128/jb.185.24.7297-7300.2003)
- 607 62. **Baynham PJ, Brown AL, Hall LL, Wozniak DJ.** *Pseudomonas aeruginosa* AlgZ, a ribbon-helix-  
608 helix DNA-binding protein, is essential for alginate synthesis and *algD* transcriptional activation.  
609 *Molecular Microbiology*. 1999;33(5):1069-80. doi:[10.1046/j.1365-2958.1999.01550.x](https://doi.org/10.1046/j.1365-2958.1999.01550.x)
- 610 63. **Baynham PJ, Ramsey DM, Gvozdyev BV, Cordonnier EM, Wozniak DJ.** The *Pseudomonas*  
611 *aeruginosa* ribbon-helix-helix DNA-binding protein AlgZ (AmrZ) controls twitching motility and  
612 biogenesis of type IV pili. *Journal of Bacteriology*. 2006;188(1):132-40. doi:[10.1128/JB.188.1.132-](https://doi.org/10.1128/JB.188.1.132-140.2006)  
613 [140.2006](https://doi.org/10.1128/JB.188.1.132-140.2006)
- 614 64. **Xu A, Zhang M, Du W, Wang D, Ma LZ.** A molecular mechanism for how sigma factor AlgT  
615 and transcriptional regulator AmrZ inhibit twitching motility in *Pseudomonas aeruginosa*.  
616 *Environmental Microbiology*. 2020. doi:[10.1111/1462-2920.14985](https://doi.org/10.1111/1462-2920.14985)
- 617 65. **Muriel C, Arrebola E, Redondo-Nieto M, Martinez-Granero F, Jalvo B, Pfeilmeier S, et al.**  
618 AmrZ is a major determinant of c-di-GMP levels in *Pseudomonas fluorescens* F113. *Scientific Reports*.  
619 2018;8(1):1979. doi:[10.1038/s41598-018-20419-9](https://doi.org/10.1038/s41598-018-20419-9)
- 620 66. **Xu B, Ju Y, Soukup RJ, Ramsey DM, Fishel R, Wysocki VH, et al.** The *Pseudomonas*  
621 *aeruginosa* AmrZ C-terminal domain mediates tetramerization and is required for its activator and  
622 repressor functions. *Environmental Microbiology Reports*. 2016;8(1):85-90. doi:[10.1111/1758-](https://doi.org/10.1111/1758-2229.12354)  
623 [2229.12354](https://doi.org/10.1111/1758-2229.12354)
- 624 67. **Arai H, Igarashi Y, Kodama T.** Expression of the *nir* and *nor* genes for denitrification of  
625 *Pseudomonas aeruginosa* requires a novel CRP/FNR-related transcriptional regulator, DNR, in  
626 addition to ANR. *FEBS Letters*. 1995;371(1):73-6. doi:[10.1016/0014-5793\(95\)00885-d](https://doi.org/10.1016/0014-5793(95)00885-d)
- 627 68. **Trunk K, Benkert B, Quack N, Munch R, Scheer M, Garbe J, et al.** Anaerobic adaptation in  
628 *Pseudomonas aeruginosa*: definition of the Anr and Dnr regulons. *Environmental Microbiology*.  
629 2010;12(6):1719-33. doi:[10.1111/j.1462-2920.2010.02252.x](https://doi.org/10.1111/j.1462-2920.2010.02252.x)
- 630 69. **Rodionov DA, Dubchak IL, Arkin AP, Alm EJ, Gelfand MS.** Dissimilatory metabolism of  
631 nitrogen oxides in bacteria: comparative reconstruction of transcriptional networks. *PLoS*  
632 *Computational Biology*. 2005;1(5):e55. doi:[10.1371/journal.pcbi.0010055](https://doi.org/10.1371/journal.pcbi.0010055)
- 633 70. **Van Alst NE, Wellington M, Clark VL, Haidaris CG, Iglewski BH.** Nitrite reductase NirS is  
634 required for type III secretion system expression and virulence in the human monocyte cell line THP-  
635 1 by *Pseudomonas aeruginosa*. *Infection and Immunity*. 2009;77(10):4446-54. doi:[10.1128/IAI.00822-](https://doi.org/10.1128/IAI.00822-09)  
636 [09](https://doi.org/10.1128/IAI.00822-09)

637 71. **Borrero-de Acuna JM, Molinari G, Rohde M, Dammeyer T, Wissing J, Jansch L, et al.** A  
638 Periplasmic Complex of the Nitrite Reductase NirS, the Chaperone DnaK, and the Flagellum Protein  
639 FliC Is Essential for Flagellum Assembly and Motility in *Pseudomonas aeruginosa*. *Journal of*  
640 *Bacteriology*. 2015;197(19):3066-75. doi:[10.1128/JB.00415-15](https://doi.org/10.1128/JB.00415-15)

641
